# Supplementary material for: TGF Beta Induces Vitamin D Receptor and Modulates Mitochondrial Activity of Human Pancreatic Cancer Cells
Source: MDPI journal article supplement (doi:10.3390/cancers13122932), 2021-06-11
Supplement: s1 [file s1]

# TGF Beta Induces Vitamin D Receptor and Modulates Mitochondrial Activity of Human Pancreatic Cancer Cells

Camilla Fiz, Giulia Apprato, Chiara Ricca, Alessia Aillon, Loredana Bergandi and Francesca Silvagno

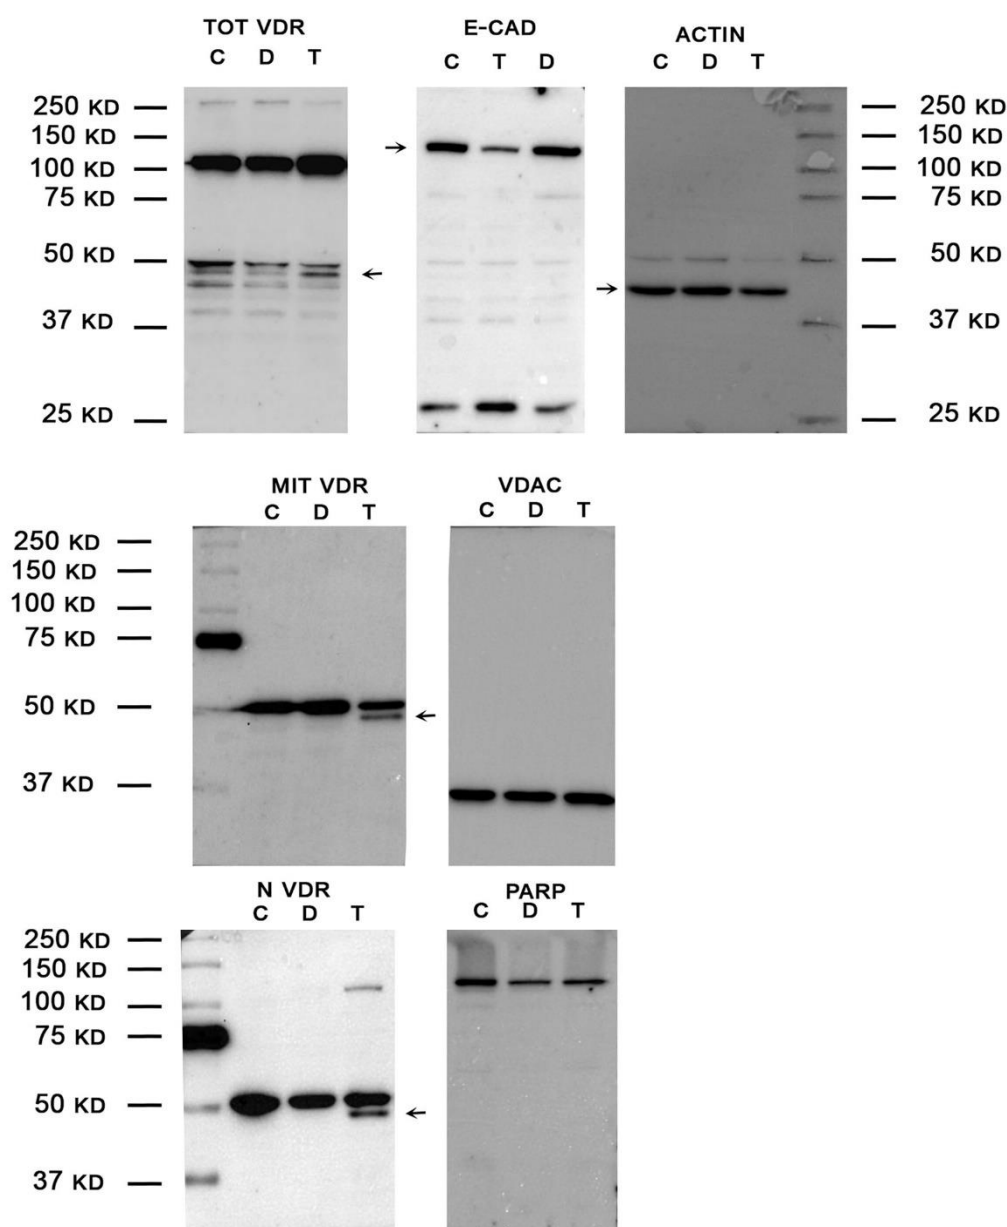

**Figure S1.** Western blotting image source for PANC-1 cells shown in Figure 1C.

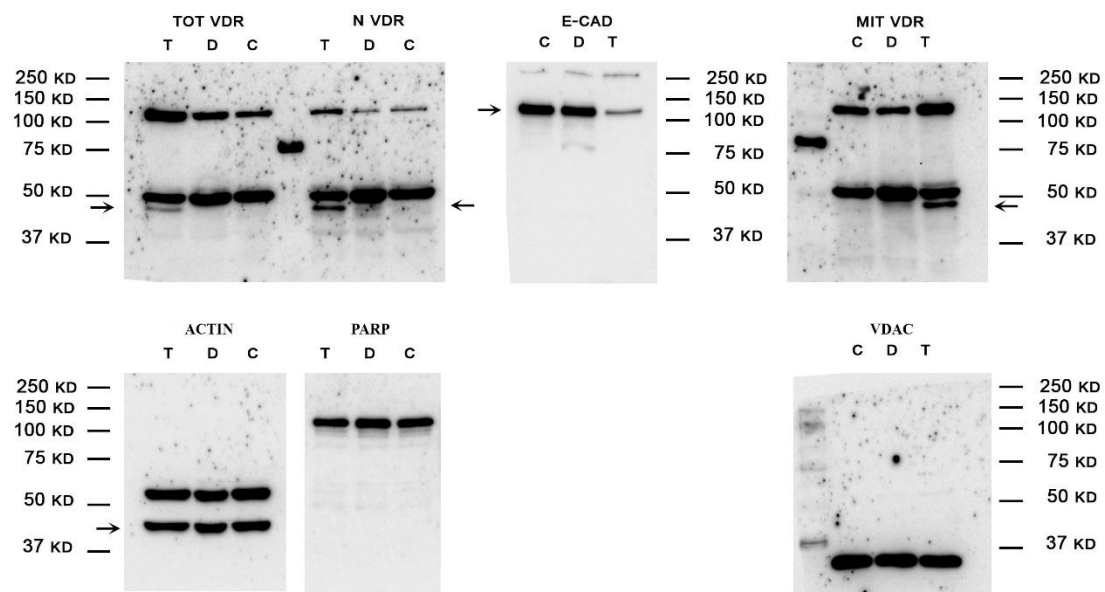

**Figure S2.** Western blotting image source for CAPAN-2 cells shown in Figure 1C.
